# Supplementary material
Source: publisher figshare collection journal article supplement (https://osapublishing.figshare.com/ndownloader/files/8965882)
Supplement: Supplementary file 1 [file 8965882]

#comment 1: column 1 is position an the diagonal of MPO with unit of milimeter.
#comment 2: column 2-7 are the efficiency values for 0.5keV, 1.0keV, 1.5keV, 2.0keV, 2.5keV and 3.0keV, respectively.
x=y(mm)	efficiency(0.5keV)	efficiency(1.0keV)	efficiency(1.5keV)	efficiency(2.0keV)	efficiency(2.5keV)	efficiency(3.0keV)
-19.97071348	0.25442195	0.2499702	0.23181992	0.079508205	0.038378138	0.026706349
-19.83100074	0.26253365	0.2580759	0.23975054	0.084530934	0.040802034	0.028886821
-19.6912892	0.2708046	0.26634393	0.24785027	0.089743974	0.043340496	0.031201221
-19.55157887	0.27923709	0.27477656	0.2561206	0.095148352	0.045996302	0.03365405
-19.41186973	0.28783196	0.28337538	0.26456301	0.10074665	0.048772765	0.036249701
-19.27216177	0.29659076	0.29214197	0.27317972	0.10654056	0.051673537	0.038992153
-19.13245498	0.30551506	0.30107713	0.28197224	0.11253164	0.05470164	0.041885179
-18.99274936	0.31460725	0.31018323	0.29094209	0.11872188	0.057860399	0.044933267
-18.8530449	0.323869	0.31946104	0.30009076	0.1251127	0.061153505	0.048140168
-18.71334159	0.3333002	0.32891385	0.30941975	0.13170598	0.064584313	0.051510108
-18.57363942	0.3429051	0.33854156	0.31893141	0.13850414	0.068155766	0.055046124
-18.43393838	0.35268267	0.34834665	0.32862638	0.14550852	0.071871984	0.058752819
-18.29423847	0.36263636	0.35832982	0.33850705	0.15272034	0.075735893	0.06263321
-18.15453967	0.3727669	0.36849457	0.34857494	0.16014266	0.079751234	0.066691668
-18.01484197	0.38307694	0.37884163	0.35883157	0.16777676	0.08392132	0.070931244
-17.87514538	0.39356718	0.38937165	0.36927944	0.17562382	0.088250407	0.07535563
-17.73544987	0.40424032	0.40008828	0.37991809	0.1836871	0.092741353	0.079968859
-17.59575545	0.41509705	0.41099115	0.39075104	0.19196784	0.09739795	0.084774416
-17.4560621	0.42614016	0.42208403	0.40177983	0.20046803	0.10222349	0.089775645
-17.31636981	0.43737027	0.43336645	0.41300604	0.20918886	0.10722289	0.094975735
-17.17667858	0.44878911	0.44484231	0.4244312	0.21813314	0.11239838	0.1003788
-17.03698839	0.46039956	0.45651221	0.43605571	0.22730295	0.11775496	0.10598838
-16.89729924	0.47220344	0.46837785	0.44788456	0.23670047	0.12329536	0.11180793
-16.75761113	0.48420132	0.48044094	0.45991583	0.24632705	0.1290241	0.11784079
-16.61792403	0.49639495	0.49270319	0.47215342	0.25618492	0.13494514	0.12409082
-16.47823795	0.50878739	0.50516632	0.48459894	0.26627732	0.14106179	0.13056057
-16.33855287	0.52138048	0.51783338	0.4972527	0.27660481	0.14737871	0.13725507
-16.19886879	0.53417475	0.53070484	0.51011751	0.28716981	0.15389851	0.14417742
-16.05918569	0.54717335	0.54378244	0.52319496	0.29797481	0.16062738	0.15133133
-15.91950358	0.56037678	0.55706934	0.53648802	0.30902244	0.16756717	0.15871969
-15.77982243	0.57378828	0.57056594	0.54999695	0.32031435	0.17472349	0.16634686
-15.64014224	0.58740977	0.58427401	0.5637233	0.33185331	0.18209966	0.17421642
-15.50046301	0.60124167	0.5981953	0.57767012	0.34364222	0.18969982	0.18233195
-15.36078473	0.61528582	0.61233468	0.59183757	0.35568059	0.19752897	0.19069782
-15.22110738	0.62954565	0.6266894	0.60622873	0.36797372	0.20559136	0.19931674
-15.08143095	0.64152008	0.63877205	0.61843229	0.37904468	0.21305905	0.20738481
-14.94175545	0.63232426	0.62977205	0.61021573	0.37756961	0.21351792	0.20862332
-14.80208086	0.62314909	0.62078437	0.60198735	0.37594012	0.21388936	0.20974223
-14.66240716	0.613997	0.61181163	0.59374871	0.37416113	0.21417149	0.21074132
-14.52273437	0.60486885	0.60285339	0.58550288	0.37223518	0.21436612	0.21162229
-14.38306245	0.59576402	0.59391224	0.57724993	0.37016721	0.2144724	0.21238338
-14.24339142	0.5866849	0.58498924	0.56899143	0.36796099	0.21449132	0.21302733
-14.10372125	0.57763095	0.57608404	0.56073041	0.3656214	0.21442215	0.21355346
-13.96405194	0.56860592	0.56719919	0.55246838	0.36314995	0.21426684	0.21396294
-13.82438349	0.55960788	0.55833576	0.54420688	0.36055264	0.21402475	0.21425698
-13.68471587	0.55063781	0.54949484	0.53594612	0.35783214	0.21369703	0.21443606
-13.54504909	0.54169934	0.54067621	0.52769034	0.35499326	0.21328317	0.21450154
-13.40538313	0.53279072	0.53188234	0.51943972	0.35203763	0.2127844	0.21445487
-13.265718	0.52391421	0.52311434	0.51119584	0.34897214	0.21220114	0.21429591
-13.12605367	0.51507077	0.51437333	0.50296024	0.34579737	0.21153468	0.21402788
-12.98639014	0.50626134	0.50565921	0.49473571	0.34251911	0.21078471	0.21364996
-12.8467274	0.49748566	0.49697558	0.48652375	0.33914	0.20995261	0.21316467
-12.70706544	0.48874713	0.48832234	0.47832353	0.33566373	0.20903973	0.21257375
-12.56740426	0.48004435	0.47969947	0.47014014	0.33209395	0.20804517	0.21187819
-12.42774384	0.47137949	0.47111047	0.4619739	0.32843333	0.2069719	0.21107982
-12.28808418	0.46275244	0.46255533	0.45382633	0.32468739	0.20581914	0.21017978
-12.14842528	0.45416644	0.4540352	0.4456979	0.3208569	0.20458911	0.20918074
-12.00876711	0.44562031	0.44555022	0.4375923	0.31694639	0.20328261	0.20808243
-11.86910967	0.43711721	0.4371037	0.42950894	0.3129603	0.20189974	0.20688835
-11.72945295	0.42865608	0.42869678	0.42145247	0.30890037	0.2004421	0.2055998
-11.58979695	0.420239	0.4203286	0.41342133	0.30477012	0.1989106	0.20421884
-11.45014166	0.41186704	0.41200141	0.40541908	0.30057305	0.19730756	0.20274619
-11.31048707	0.40354124	0.40371737	0.39744722	0.2963118	0.19563259	0.20118469
-11.17083316	0.39526268	0.39547672	0.38950632	0.29199063	0.19388739	0.19953649
-11.03117993	0.38703242	0.3872816	0.38159885	0.28761135	0.19207368	0.19780246
-10.89152738	0.37885157	0.37913229	0.37372633	0.28317817	0.19019253	0.19598549
-10.75187549	0.37072121	0.37103005	0.36589026	0.27869292	0.18824506	0.19408654
-10.61222426	0.36264161	0.36297614	0.35809135	0.27415973	0.18623305	0.19210916
-10.47257367	0.35461559	0.35497263	0.35033281	0.2695812	0.18415709	0.19005376
-10.33292372	0.34664342	0.34701994	0.34261532	0.26496062	0.18201961	0.18792331
-10.1932744	0.33872623	0.33912013	0.33494041	0.2603006	0.17982127	0.18572013
-10.0536257	0.33086516	0.33127444	0.32731041	0.25560371	0.17756338	0.18344599
-9.913977612	0.32306139	0.32348261	0.31972605	0.25087457	0.17524842	0.1811027
-9.77433013	0.31531534	0.31574817	0.3121889	0.24611437	0.17287717	0.17869213
-9.634683243	0.30763038	0.30807092	0.30470121	0.24132635	0.17045107	0.1762178
-9.495036943	0.3000055	0.30045287	0.29726451	0.23651371	0.16797261	0.17368053
-9.355391222	0.29244265	0.29289461	0.28987964	0.23167958	0.16544272	0.17108332
-9.215746071	0.28494302	0.28539815	0.28254884	0.2268265	0.16286293	0.16842863
-9.076101481	0.27750847	0.27796413	0.27527362	0.22195699	0.16023576	0.16571795
-8.936457444	0.27013894	0.27059514	0.26805554	0.21707418	0.15756184	0.1629538
-8.796813952	0.26283693	0.26329125	0.26089613	0.21218057	0.15484418	0.16013873
-8.657170996	0.25560304	0.25605441	0.25379694	0.20727924	0.15208351	0.1572748
-8.517528568	0.24843855	0.24888594	0.24676008	0.20237321	0.14928242	0.1543646
-8.377886658	0.24134473	0.24178664	0.23978654	0.19746447	0.14644218	0.15141068
-8.238245259	0.23432338	0.23475897	0.23287787	0.19255605	0.1435654	0.14841479
-8.098604361	0.22737474	0.2278032	0.22603616	0.18765092	0.14065304	0.14537996
-7.958963958	0.22050114	0.22092175	0.21926246	0.18275159	0.13770776	0.142308
-7.819324039	0.21370338	0.21411498	0.21255882	0.17786056	0.1347318	0.13920199
-7.679684596	0.20698324	0.20738526	0.20592634	0.17298077	0.13172667	0.13606418
-7.540045622	0.20034113	0.20073348	0.19936706	0.16811512	0.12869433	0.13289725
-7.400407107	0.1937793	0.19416062	0.19288255	0.16326571	0.12563712	0.12970317
-7.260769042	0.18729866	0.18766897	0.18647437	0.15843543	0.12255743	0.1264847
-7.121131421	0.18090098	0.18125912	0.18014411	0.15362717	0.11945729	0.1232449
-6.981494233	0.17458721	0.17493369	0.17389334	0.14884304	0.11633881	0.11998587
-6.84185747	0.16835875	0.16869294	0.16772367	0.14408628	0.11320412	0.11671038
-6.702221124	0.16221737	0.16253871	0.16163705	0.13935902	0.11005574	0.11342094
-6.562585187	0.15616376	0.15647283	0.15563436	0.13466413	0.10689617	0.11012037
-6.422949649	0.15020038	0.15049638	0.14971792	0.1300044	0.10372738	0.10681152
-6.283314503	0.14432765	0.14461086	0.1438893	0.12538205	0.10055198	0.10349668
-6.14367974	0.13854766	0.13881806	0.13814981	0.12079989	0.09737233	0.10017903
-6.004045351	0.13286184	0.13311917	0.13250108	0.11626073	0.094191332	0.096861216
-5.864411328	0.12727137	0.1275157	0.12694531	0.11176707	0.091010933	0.093546163
-5.724777662	0.12177772	0.12200944	0.12148356	0.1073212	0.087834117	0.090236362
-5.585144344	0.11638267	0.11660165	0.11611774	0.1029264	0.084663202	0.086935043
-5.445511368	0.11108744	0.1112941	0.11084949	0.098584715	0.081501428	0.083644994
-5.305878722	0.10589379	0.10608833	0.10568045	0.094298953	0.078351001	0.080369057
-5.166246401	0.10080302	0.10098566	0.10061208	0.090071887	0.075214827	0.077110317
-5.026614394	0.095816882	0.095987866	0.095646463	0.085906075	0.072095836	0.073871874
-4.886982693	0.090936718	0.091096318	0.090785062	0.081804096	0.068996649	0.070656677
-4.74735129	0.08616429	0.086312805	0.08602974	0.077768552	0.06592047	0.067467731
-4.607720176	0.081500984	0.081638908	0.081381986	0.073802394	0.062870195	0.06430825
-4.468089343	0.07694857	0.077076059	0.076843503	0.069907895	0.059848789	0.061181472
-4.328458782	0.072508634	0.07262605	0.072416158	0.066088014	0.056859419	0.058090524
-4.188828485	0.068182633	0.068290499	0.0681015	0.062345519	0.053905166	0.055038591
-4.049198443	0.063972347	0.064071039	0.063901396	0.058682779	0.050989299	0.052029162
-3.909568647	0.059879279	0.059969312	0.059817563	0.055102741	0.048114904	0.049065382
-3.76993909	0.055905217	0.055986976	0.055851727	0.051608082	0.045285596	0.046150706
-3.630309763	0.052051817	0.0521257	0.052005625	0.048201608	0.042504481	0.043288721
-3.490680657	0.04832065	0.048387063	0.048280906	0.044885925	0.039775078	0.040482649
-3.351051763	0.04471352	0.044772972	0.044679539	0.041663877	0.037100953	0.037736269
-3.211423074	0.041232128	0.041285024	0.041203188	0.038538221	0.034485727	0.035053026
-3.07179458	0.037878188	0.037924938	0.037853636	0.035511815	0.031933005	0.032436535
-2.932166273	0.034653358	0.034694449	0.034632676	0.032587451	0.029446474	0.029890681
-2.792538145	0.031559468	0.031595368	0.031542183	0.029767948	0.027029969	0.027419106
-2.652910187	0.028598277	0.028629315	0.028583893	0.027056213	0.024687331	0.025025605
-2.513282391	0.025771559	0.025798189	0.025759639	0.024455051	0.022422541	0.022714097
-2.373654748	0.023081056	0.02310371	0.023071357	0.021967465	0.020239647	0.020488602
-2.23402725	0.02052863	0.020547677	0.020520784	0.019596358	0.018142693	0.01835306
-2.094399887	0.018116099	0.01813194	0.018109825	0.017344669	0.016135941	0.016311579
-1.954772653	0.015845299	0.015858278	0.015840311	0.015215401	0.01422365	0.014368334
-1.815145537	0.013718078	0.013728559	0.013714191	0.013211489	0.012410207	0.01252754
-1.675518532	0.011736301	0.0117446	0.011733294	0.011336055	0.010700036	0.010793544
-1.535891629	0.009901828	0.009908269	0.00989958	0.009592148	0.009097757	0.009170693
-1.396264819	0.0082166	0.008221464	0.00821494	0.007982855	0.007607991	0.007663473
-1.256638095	0.006682505	0.006686071	0.006681307	0.006511285	0.006235492	0.006276463
-1.117011447	0.005301459	0.005303981	0.00530064	0.005180631	0.004985146	0.005014271
-0.977384867	0.004075423	0.004077126	0.004074886	0.003994085	0.003861921	0.003881672
-0.837758347	0.003006361	0.003007438	0.003006026	0.00295488	0.002870883	0.00288347
-0.698131878	0.002096234	0.00209686	0.002096043	0.002066293	0.002017231	0.002024604
-0.558505451	0.001347043	0.001347364	0.001346945	0.001331633	0.001306282	0.001310101
-0.418879059	0.00076079	0.000760928	0.000760749	0.000754257	0.000743461	0.000745092
-0.279252692	0.000339503	0.000339544	0.000339491	0.000337557	0.000334328	0.000334818
-0.139626342	8.52E-05	8.52E-05	8.52E-05	8.50E-05	8.46E-05	8.46E-05
0	0	0	0	0	0	0
0.139626342	8.52E-05	8.52E-05	8.52E-05	8.50E-05	8.46E-05	8.46E-05
0.279252692	0.000339503	0.000339544	0.000339491	0.000337557	0.000334328	0.000334818
0.418879059	0.00076079	0.000760928	0.000760749	0.000754257	0.000743461	0.000745092
0.558505451	0.001347043	0.001347364	0.001346945	0.001331633	0.001306282	0.001310101
0.698131878	0.002096234	0.00209686	0.002096043	0.002066293	0.002017231	0.002024604
0.837758347	0.003006361	0.003007438	0.003006026	0.00295488	0.002870883	0.00288347
0.977384867	0.004075423	0.004077126	0.004074886	0.003994085	0.003861921	0.003881672
1.117011447	0.005301459	0.005303981	0.00530064	0.005180631	0.004985146	0.005014271
1.256638095	0.006682505	0.006686071	0.006681307	0.006511285	0.006235492	0.006276463
1.396264819	0.0082166	0.008221464	0.00821494	0.007982855	0.007607991	0.007663473
1.535891629	0.009901828	0.009908269	0.00989958	0.009592148	0.009097757	0.009170693
1.675518532	0.011736301	0.0117446	0.011733294	0.011336055	0.010700036	0.010793544
1.815145537	0.013718078	0.013728559	0.013714191	0.013211489	0.012410207	0.01252754
1.954772653	0.015845299	0.015858278	0.015840311	0.015215401	0.01422365	0.014368334
2.094399887	0.018116099	0.01813194	0.018109825	0.017344669	0.016135941	0.016311579
2.23402725	0.02052863	0.020547677	0.020520784	0.019596358	0.018142693	0.01835306
2.373654748	0.023081056	0.02310371	0.023071357	0.021967465	0.020239647	0.020488602
2.513282391	0.025771559	0.025798189	0.025759639	0.024455051	0.022422541	0.022714097
2.652910187	0.028598277	0.028629315	0.028583893	0.027056213	0.024687331	0.025025605
2.792538145	0.031559468	0.031595368	0.031542183	0.029767948	0.027029969	0.027419106
2.932166273	0.034653358	0.034694449	0.034632676	0.032587451	0.029446474	0.029890681
3.07179458	0.037878188	0.037924938	0.037853636	0.035511815	0.031933005	0.032436535
3.211423074	0.041232128	0.041285024	0.041203188	0.038538221	0.034485727	0.035053026
3.351051763	0.04471352	0.044772972	0.044679539	0.041663877	0.037100953	0.037736269
3.490680657	0.04832065	0.048387063	0.048280906	0.044885925	0.039775078	0.040482649
3.630309763	0.052051817	0.0521257	0.052005625	0.048201608	0.042504481	0.043288721
3.76993909	0.055905217	0.055986976	0.055851727	0.051608082	0.045285596	0.046150706
3.909568647	0.059879279	0.059969312	0.059817563	0.055102741	0.048114904	0.049065382
4.049198443	0.063972347	0.064071039	0.063901396	0.058682779	0.050989299	0.052029162
4.188828485	0.068182633	0.068290499	0.0681015	0.062345519	0.053905166	0.055038591
4.328458782	0.072508634	0.07262605	0.072416158	0.066088014	0.056859419	0.058090524
4.468089343	0.07694857	0.077076059	0.076843503	0.069907895	0.059848789	0.061181472
4.607720176	0.081500984	0.081638908	0.081381986	0.073802394	0.062870195	0.06430825
4.74735129	0.08616429	0.086312805	0.08602974	0.077768552	0.06592047	0.067467731
4.886982693	0.090936718	0.091096318	0.090785062	0.081804096	0.068996649	0.070656677
5.026614394	0.095816882	0.095987866	0.095646463	0.085906075	0.072095836	0.073871874
5.166246401	0.10080302	0.10098566	0.10061208	0.090071887	0.075214827	0.077110317
5.305878722	0.10589379	0.10608833	0.10568045	0.094298953	0.078351001	0.080369057
5.445511368	0.11108744	0.1112941	0.11084949	0.098584715	0.081501428	0.083644994
5.585144344	0.11638267	0.11660165	0.11611774	0.1029264	0.084663202	0.086935043
5.724777662	0.12177772	0.12200944	0.12148356	0.1073212	0.087834117	0.090236362
5.864411328	0.12727137	0.1275157	0.12694531	0.11176707	0.091010933	0.093546163
6.004045351	0.13286184	0.13311917	0.13250108	0.11626073	0.094191332	0.096861216
6.14367974	0.13854766	0.13881806	0.13814981	0.12079989	0.09737233	0.10017903
6.283314503	0.14432765	0.14461086	0.1438893	0.12538205	0.10055198	0.10349668
6.422949649	0.15020038	0.15049638	0.14971792	0.1300044	0.10372738	0.10681152
6.562585187	0.15616376	0.15647283	0.15563436	0.13466413	0.10689617	0.11012037
6.702221124	0.16221737	0.16253871	0.16163705	0.13935902	0.11005574	0.11342094
6.84185747	0.16835875	0.16869294	0.16772367	0.14408628	0.11320412	0.11671038
6.981494233	0.17458721	0.17493369	0.17389334	0.14884304	0.11633881	0.11998587
7.121131421	0.18090098	0.18125912	0.18014411	0.15362717	0.11945729	0.1232449
7.260769042	0.18729866	0.18766897	0.18647437	0.15843543	0.12255743	0.1264847
7.400407107	0.1937793	0.19416062	0.19288255	0.16326571	0.12563712	0.12970317
7.540045622	0.20034113	0.20073348	0.19936706	0.16811512	0.12869433	0.13289725
7.679684596	0.20698324	0.20738526	0.20592634	0.17298077	0.13172667	0.13606418
7.819324039	0.21370338	0.21411498	0.21255882	0.17786056	0.1347318	0.13920199
7.958963958	0.22050114	0.22092175	0.21926246	0.18275159	0.13770776	0.142308
8.098604361	0.22737474	0.2278032	0.22603616	0.18765092	0.14065304	0.14537996
8.238245259	0.23432338	0.23475897	0.23287787	0.19255605	0.1435654	0.14841479
8.377886658	0.24134473	0.24178664	0.23978654	0.19746447	0.14644218	0.15141068
8.517528568	0.24843855	0.24888594	0.24676008	0.20237321	0.14928242	0.1543646
8.657170996	0.25560304	0.25605441	0.25379694	0.20727924	0.15208351	0.1572748
8.796813952	0.26283693	0.26329125	0.26089613	0.21218057	0.15484418	0.16013873
8.936457444	0.27013894	0.27059514	0.26805554	0.21707418	0.15756184	0.1629538
9.076101481	0.27750847	0.27796413	0.27527362	0.22195699	0.16023576	0.16571795
9.215746071	0.28494302	0.28539815	0.28254884	0.2268265	0.16286293	0.16842863
9.355391222	0.29244265	0.29289461	0.28987964	0.23167958	0.16544272	0.17108332
9.495036943	0.3000055	0.30045287	0.29726451	0.23651371	0.16797261	0.17368053
9.634683243	0.30763038	0.30807092	0.30470121	0.24132635	0.17045107	0.1762178
9.77433013	0.31531534	0.31574817	0.3121889	0.24611437	0.17287717	0.17869213
9.913977612	0.32306139	0.32348261	0.31972605	0.25087457	0.17524842	0.1811027
10.0536257	0.33086516	0.33127444	0.32731041	0.25560371	0.17756338	0.18344599
10.1932744	0.33872623	0.33912013	0.33494041	0.2603006	0.17982127	0.18572013
10.33292372	0.34664342	0.34701994	0.34261532	0.26496062	0.18201961	0.18792331
10.47257367	0.35461559	0.35497263	0.35033281	0.2695812	0.18415709	0.19005376
10.61222426	0.36264161	0.36297614	0.35809135	0.27415973	0.18623305	0.19210916
10.75187549	0.37072121	0.37103005	0.36589026	0.27869292	0.18824506	0.19408654
10.89152738	0.37885157	0.37913229	0.37372633	0.28317817	0.19019253	0.19598549
11.03117993	0.38703242	0.3872816	0.38159885	0.28761135	0.19207368	0.19780246
11.17083316	0.39526268	0.39547672	0.38950632	0.29199063	0.19388739	0.19953649
11.31048707	0.40354124	0.40371737	0.39744722	0.2963118	0.19563259	0.20118469
11.45014166	0.41186704	0.41200141	0.40541908	0.30057305	0.19730756	0.20274619
11.58979695	0.420239	0.4203286	0.41342133	0.30477012	0.1989106	0.20421884
11.72945295	0.42865608	0.42869678	0.42145247	0.30890037	0.2004421	0.2055998
11.86910967	0.43711721	0.4371037	0.42950894	0.3129603	0.20189974	0.20688835
12.00876711	0.44562031	0.44555022	0.4375923	0.31694639	0.20328261	0.20808243
12.14842528	0.45416644	0.4540352	0.4456979	0.3208569	0.20458911	0.20918074
12.28808418	0.46275244	0.46255533	0.45382633	0.32468739	0.20581914	0.21017978
12.42774384	0.47137949	0.47111047	0.4619739	0.32843333	0.2069719	0.21107982
12.56740426	0.48004435	0.47969947	0.47014014	0.33209395	0.20804517	0.21187819
12.70706544	0.48874713	0.48832234	0.47832353	0.33566373	0.20903973	0.21257375
12.8467274	0.49748566	0.49697558	0.48652375	0.33914	0.20995261	0.21316467
12.98639014	0.50626134	0.50565921	0.49473571	0.34251911	0.21078471	0.21364996
13.12605367	0.51507077	0.51437333	0.50296024	0.34579737	0.21153468	0.21402788
13.265718	0.52391421	0.52311434	0.51119584	0.34897214	0.21220114	0.21429591
13.40538313	0.53279072	0.53188234	0.51943972	0.35203763	0.2127844	0.21445487
13.54504909	0.54169934	0.54067621	0.52769034	0.35499326	0.21328317	0.21450154
13.68471587	0.55063781	0.54949484	0.53594612	0.35783214	0.21369703	0.21443606
13.82438349	0.55960788	0.55833576	0.54420688	0.36055264	0.21402475	0.21425698
13.96405194	0.56860592	0.56719919	0.55246838	0.36314995	0.21426684	0.21396294
14.10372125	0.57763095	0.57608404	0.56073041	0.3656214	0.21442215	0.21355346
14.24339142	0.5866849	0.58498924	0.56899143	0.36796099	0.21449132	0.21302733
14.38306245	0.59576402	0.59391224	0.57724993	0.37016721	0.2144724	0.21238338
14.52273437	0.60486885	0.60285339	0.58550288	0.37223518	0.21436612	0.21162229
14.66240716	0.613997	0.61181163	0.59374871	0.37416113	0.21417149	0.21074132
14.80208086	0.62314909	0.62078437	0.60198735	0.37594012	0.21388936	0.20974223
14.94175545	0.63232426	0.62977205	0.61021573	0.37756961	0.21351792	0.20862332
15.08143095	0.64152008	0.63877205	0.61843229	0.37904468	0.21305905	0.20738481
15.22110738	0.62954565	0.6266894	0.60622873	0.36797372	0.20559136	0.19931674
15.36078473	0.61528582	0.61233468	0.59183757	0.35568059	0.19752897	0.19069782
15.50046301	0.60124167	0.5981953	0.57767012	0.34364222	0.18969982	0.18233195
15.64014224	0.58740977	0.58427401	0.5637233	0.33185331	0.18209966	0.17421642
15.77982243	0.57378828	0.57056594	0.54999695	0.32031435	0.17472349	0.16634686
15.91950358	0.56037678	0.55706934	0.53648802	0.30902244	0.16756717	0.15871969
16.05918569	0.54717335	0.54378244	0.52319496	0.29797481	0.16062738	0.15133133
16.19886879	0.53417475	0.53070484	0.51011751	0.28716981	0.15389851	0.14417742
16.33855287	0.52138048	0.51783338	0.4972527	0.27660481	0.14737871	0.13725507
16.47823795	0.50878739	0.50516632	0.48459894	0.26627732	0.14106179	0.13056057
16.61792403	0.49639495	0.49270319	0.47215342	0.25618492	0.13494514	0.12409082
16.75761113	0.48420132	0.48044094	0.45991583	0.24632705	0.1290241	0.11784079
16.89729924	0.47220344	0.46837785	0.44788456	0.23670047	0.12329536	0.11180793
17.03698839	0.46039956	0.45651221	0.43605571	0.22730295	0.11775496	0.10598838
17.17667858	0.44878911	0.44484231	0.4244312	0.21813314	0.11239838	0.1003788
17.31636981	0.43737027	0.43336645	0.41300604	0.20918886	0.10722289	0.094975735
17.4560621	0.42614016	0.42208403	0.40177983	0.20046803	0.10222349	0.089775645
17.59575545	0.41509705	0.41099115	0.39075104	0.19196784	0.09739795	0.084774416
17.73544987	0.40424032	0.40008828	0.37991809	0.1836871	0.092741353	0.079968859
17.87514538	0.39356718	0.38937165	0.36927944	0.17562382	0.088250407	0.07535563
18.01484197	0.38307694	0.37884163	0.35883157	0.16777676	0.08392132	0.070931244
18.15453967	0.3727669	0.36849457	0.34857494	0.16014266	0.079751234	0.066691668
18.29423847	0.36263636	0.35832982	0.33850705	0.15272034	0.075735893	0.06263321
18.43393838	0.35268267	0.34834665	0.32862638	0.14550852	0.071871984	0.058752819
18.57363942	0.3429051	0.33854156	0.31893141	0.13850414	0.068155766	0.055046124
18.71334159	0.3333002	0.32891385	0.30941975	0.13170598	0.064584313	0.051510108
18.8530449	0.323869	0.31946104	0.30009076	0.1251127	0.061153505	0.048140168
18.99274936	0.31460725	0.31018323	0.29094209	0.11872188	0.057860399	0.044933267
19.13245498	0.30551506	0.30107713	0.28197224	0.11253164	0.05470164	0.041885179
19.27216177	0.29659076	0.29214197	0.27317972	0.10654056	0.051673537	0.038992153
19.41186973	0.28783196	0.28337538	0.26456301	0.10074665	0.048772765	0.036249701
19.55157887	0.27923709	0.27477656	0.2561206	0.095148352	0.045996302	0.03365405
19.6912892	0.2708046	0.26634393	0.24785027	0.089743974	0.043340496	0.031201221
19.83100074	0.26253365	0.2580759	0.23975054	0.084530934	0.040802034	0.028886821
19.97071348	0.25442195	0.2499702	0.23181992	0.079508205	0.038378138	0.026706349
